# Supplementary material for: Reductive evolution and unique infection and feeding mode in the CPR predatory bacterium Vampirococcus lugosii
Source: bioRxiv preprint, doi:10.1101/2020.11.10.374967, version 1 (2020-11-10)
Supplement: Supplementary material [file 374967_file02.pdf]

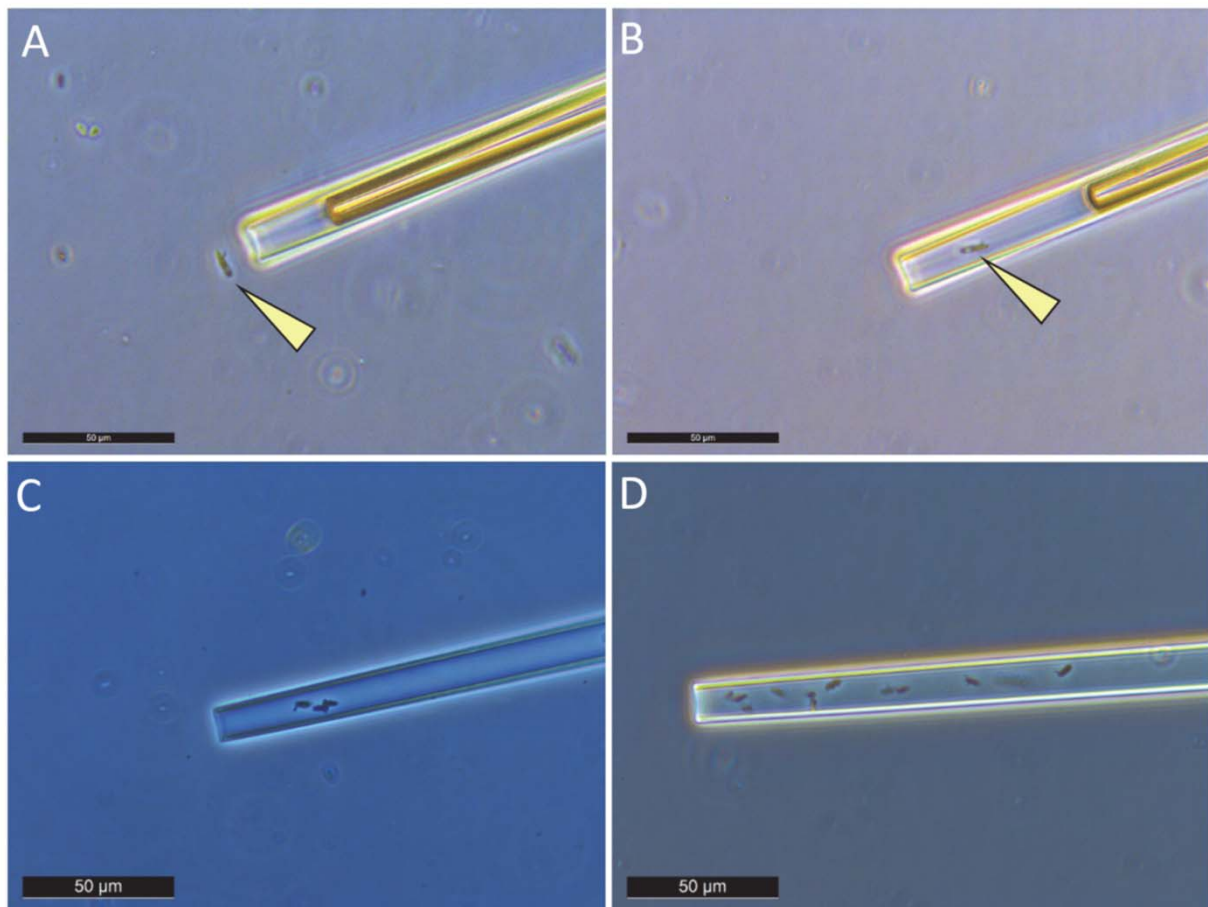

**Extended Data Fig. 1** | Phase contrast microscopy images of micromanipulation of cells infected by *Vampirococcus* using a glass capillary. Yellow arrows in panels A and B indicate the same infected cells outside and inside the capillary. Panels C and D show capillaries containing several infected cells.

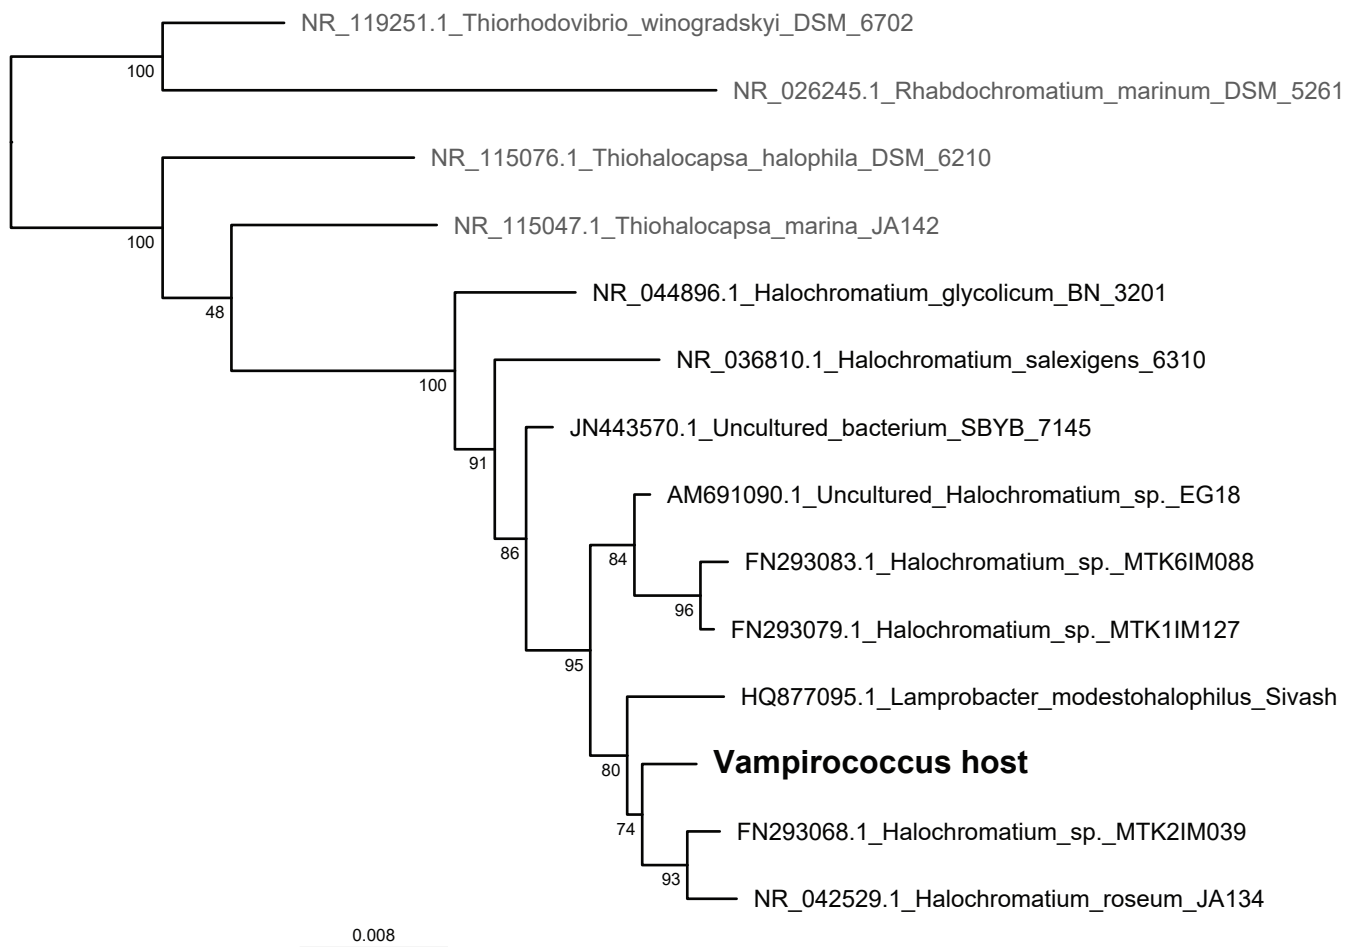

**Extended Data Fig. 2** | 16S rRNA gene maximum likelihood phylogenetic tree of the *Vamprococcus* host. The tree is based on 1425 conserved aligned positions. Numbers at nodes are bootstrap support values (100 replicates).

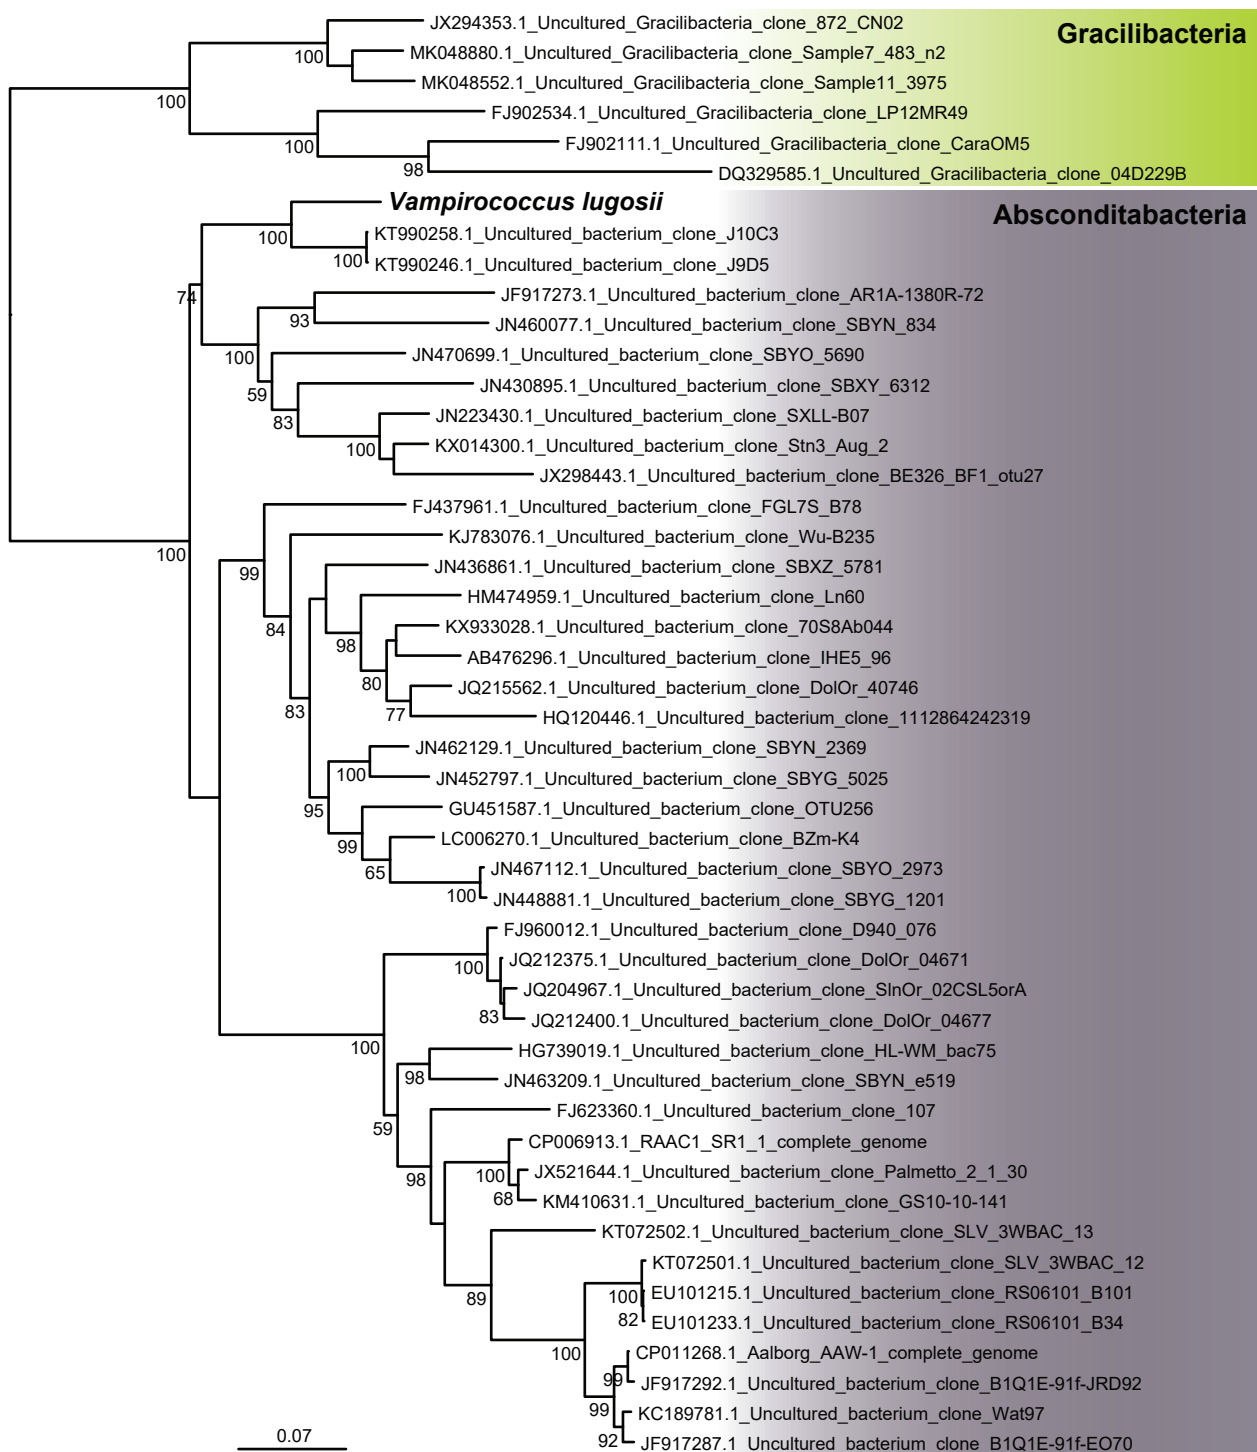

**Extended Data Fig. 3** | 16S rRNA gene maximum likelihood phylogenetic tree of *Vampirococcus*. The tree is based on 1282 conserved aligned positions. Numbers at nodes are bootstrap support values (100 replicates). The tree is rooted on several Gracilibacteria sequences.



| Protein        | Function                                                 |
|----------------|----------------------------------------------------------|
| VAMP_2_16      | ATPase AAA                                               |
| VAMP_2_102     | uracil-DNA glycosylase                                   |
| VAMP_2_126     | amino acid kinase family protein                         |
| VAMP_2_142     | acid phosphatase family membrane protein YuiD            |
| VAMP_2_172     | 5'(3')-deoxyribonucleotidase, containing HAD-like domain |
| VAMP_2_376     | coproporphyrinogen III oxidase                           |
| VAMP_2_652     | spermidine synthase                                      |
| VAMP_2_667     | peptidase M50B family, putative                          |
| VAMP_2_731     | hypothetical protein                                     |
| VAMP_5_14      | Asp-tRNAAsn/Glu-tRNAGln amidotransferase                 |
| VAMP_5_86      | arginyl-tRNA synthetase                                  |
| VAMP_5_322     | sulfate permease                                         |
| VAMP_5_352     | hypothetical protein                                     |
| VAMP_6_101     | UDP-N-acetylenolpyruvoylglucosamine reductase            |
| VAMP_7_1       | group 1 glycosyl transferase                             |
| VAMP_7_38      | glycosyltransferase                                      |
| VAMP_7_63      | sulfotransferase                                         |
| VAMP_7_102     | ATPase, AAA+ superfamily                                 |
| VAMP_8_21      | putative bacterial transferase                           |
| VAMP_8_278     | zinc transporter ZupT                                    |
| VAMP_11_1      | type III restriction endonuclease                        |
| VAMP_11_32     | death-on-curing protein                                  |
| VAMP_11_87     | membrane protein                                         |
| VAMP_11_209    | hypothetical protein                                     |
| VAMP_12_204    | hypothetical protein                                     |
| VAMP_12_314    | inosine 5'-monophosphate dehydrogenase                   |
| VAMP_12_407    | membrane protein                                         |
| VAMP_12_450    | restriction endonuclease                                 |
| VAMP_13_135    | adenosylhomocysteinase                                   |
| VAMP_13_214    | lysophospholipase                                        |
| VAMP_13_272    | membrane protein                                         |
| VAMP_13_309    | ABC transporter                                          |
| VAMP_13_360    | superoxide dismutase                                     |
| VAMP_16_4      | hypothetical protein                                     |
| VAMP_74-20_301 | metal-dependent hydrolase                                |
| VAMP_74-20_334 | type I site-specific deoxyribonuclease                   |
| VAMP_74-20_345 | helix-turn-helix domain-containing protein               |
| VAMP_74-20_352 | hypothetical protein                                     |
| VAMP_21_15     | CRISPR-associated protein Csm3                           |
| VAMP_21_88     | CRISPR/Cas system-associated protein                     |
| VAMP_21_151    | CRISPR-associated protein Cas1                           |
| VAMP_21_166    | CRISPR/Cas system-associated endoribonuclease            |
| VAMP_22_222    | HD superfamily hydrolase (HD-GYP...                      |
| VAMP_24_237    | restriction endonuclease S subunit                       |
| VAMP_25_1      | HD superfamily hydrolase                                 |
| VAMP_25_65     | putative diaminopimelate decarboxylase                   |
| VAMP_27_9      | ATPase AAA, partial                                      |
| VAMP_27_16     | K <sup>+</sup> transport system, NAD-binding             |
| VAMP_27_59     | hypothetical protein                                     |
| VAMP_27_173    | CDP-diglyceride synthetase                               |
| VAMP_31-433_4  | putative transposase                                     |
| VAMP_34_196    | adenine specific DNA methylase                           |
| VAMP_34_248    | putative DEAD/DEAH box helicase                          |
| VAMP_34_317    | transposase                                              |
| VAMP_36_45     | predicted ATPase                                         |
| VAMP_36_80     | steroid 5-alpha reductase family                         |
| VAMP_36_96     | CAAX protease, self-immunity related                     |

|                  |                                                                  |
|------------------|------------------------------------------------------------------|
| VAMP_40_134      | surface antigen                                                  |
| VAMP_40_177      | hAD phosphatase family IIIA                                      |
| VAMP_41_97       | C4-dicarboxylate ABC transporter                                 |
| VAMP_44_14       | thymidylate synthase                                             |
| VAMP_44_34       | ribosome-associated GTPase EngA                                  |
| VAMP_44_51       | helicase                                                         |
| VAMP_44_164      | transposase, IS4 family                                          |
| VAMP_46_8        | ATPase AAA                                                       |
| VAMP_46_21       | restriction endonuclease                                         |
| VAMP_46_157      | nitrous oxidase accessory protein                                |
| VAMP_48_7        | ATPase AAA                                                       |
| VAMP_48_145      | transposase                                                      |
| VAMP_48_161      | Kazal-type serine protease inhibitor                             |
| VAMP_68-56_291   | integrase                                                        |
| VAMP_59_23       | hypothetical protein                                             |
| VAMP_62_140      | DNA methylase N-4                                                |
| VAMP_63_143      | hypothetical protein                                             |
| VAMP_64_89       | aspartate racemase                                               |
| VAMP_64_127      | integrase                                                        |
| VAMP_67_138      | DNA binding protein, containing HHH motif                        |
| VAMP_68-56_2     | hypothetical protein                                             |
| VAMP_70_1        | transposase                                                      |
| VAMP_74-20_92    | hypothetical protein                                             |
| VAMP_84_6        | transposase, partial                                             |
| VAMP_84_29       | cell wall assembly/cell proliferation coordinating protein, KNR4 |
| VAMP_84_167      | transposase                                                      |
| VAMP_85_12       | ATPase                                                           |
| VAMP_85_59       | methyl-accepting chemotaxis protein (MCP)                        |
| VAMP_98_42       | ATP-dependent endonuclease                                       |
| VAMP_98_79       | modification methylase HgaI-1                                    |
| VAMP_98_91       | type I restriction endonuclease subunit M                        |
| VAMP_98_96       | DNA-binding beta-propeller fold protein YncE                     |
| VAMP_102_119     | pectin lyase, putative                                           |
| VAMP_106-108_174 | metallo-beta-lactamase superfamily protein                       |
| VAMP_115_23      | sialyltransferase, partial                                       |
| VAMP_119_19      | DNA-binding protein                                              |
| VAMP_119_36      | glycosyltransferase, GT2 family                                  |
| VAMP_119_100     | DNA binding protein, containing Kila-N domain                    |
| VAMP_125_114     | hypothetical protein                                             |
| VAMP_134_102     | NAD(P)-dependent dehydrogenase                                   |
| VAMP_134_122     | AAA+ ATPase superfamily                                          |
| VAMP_141_15      | membrane protein                                                 |
| VAMP_144_15      | nucleoside-triphosphatase                                        |
| VAMP_152_39      | DNA methyltransferase                                            |
| VAMP_163_8       | hypothetical protein                                             |
| VAMP_163_14      | hypothetical protein                                             |
| VAMP_163_27      | hypothetical protein                                             |
| VAMP_163_38      | transcription factor E (TFE)                                     |
| VAMP_163_45      | tRNA methyltransferase                                           |
| VAMP_169_4       | 5-methylcytosine-specific restriction related enzyme             |
| VAMP_197_9       | AAA+ ATPase superfamily                                          |
| VAMP_237_13      | restriction endonuclease subunit S                               |
| VAMP_247_44      | protease, CAAX family                                            |
| VAMP_247_64      | SPFH domain-containing protein                                   |
| VAMP_283_8       | ATPase AAA                                                       |
| VAMP_315_21      | hypothetical protein                                             |
| VAMP_325_1       | outer membrane protein OmpA                                      |
| VAMP_328_89      | membrane protein                                                 |

|                 |                                                          |
|-----------------|----------------------------------------------------------|
| VAMP_368_47     | protein of unknown function, DUF285                      |
| VAMP_379_21     | cold-shock protein                                       |
| VAMP_397_11     | ribonuclease H                                           |
| VAMP_405_17     | ParB-like and HNH nuclease domains                       |
| VAMP_31-433_257 | hypothetical protein                                     |
| VAMP_472_45     | hypothetical protein                                     |
| VAMP_493_19     | membrane protein                                         |
| VAMP_525_55     | 5-methylcytosine-specific restriction endonuclease McrBC |
| VAMP_18_255     | ATPase AAA                                               |
| VAMP_18_221     | chemotaxis protein                                       |
| VAMP_18_122     | hypothetical protein                                     |

**Extended Data Fig. 5 |** *Vampirococcus* genes acquired by horizontal gene transfer.

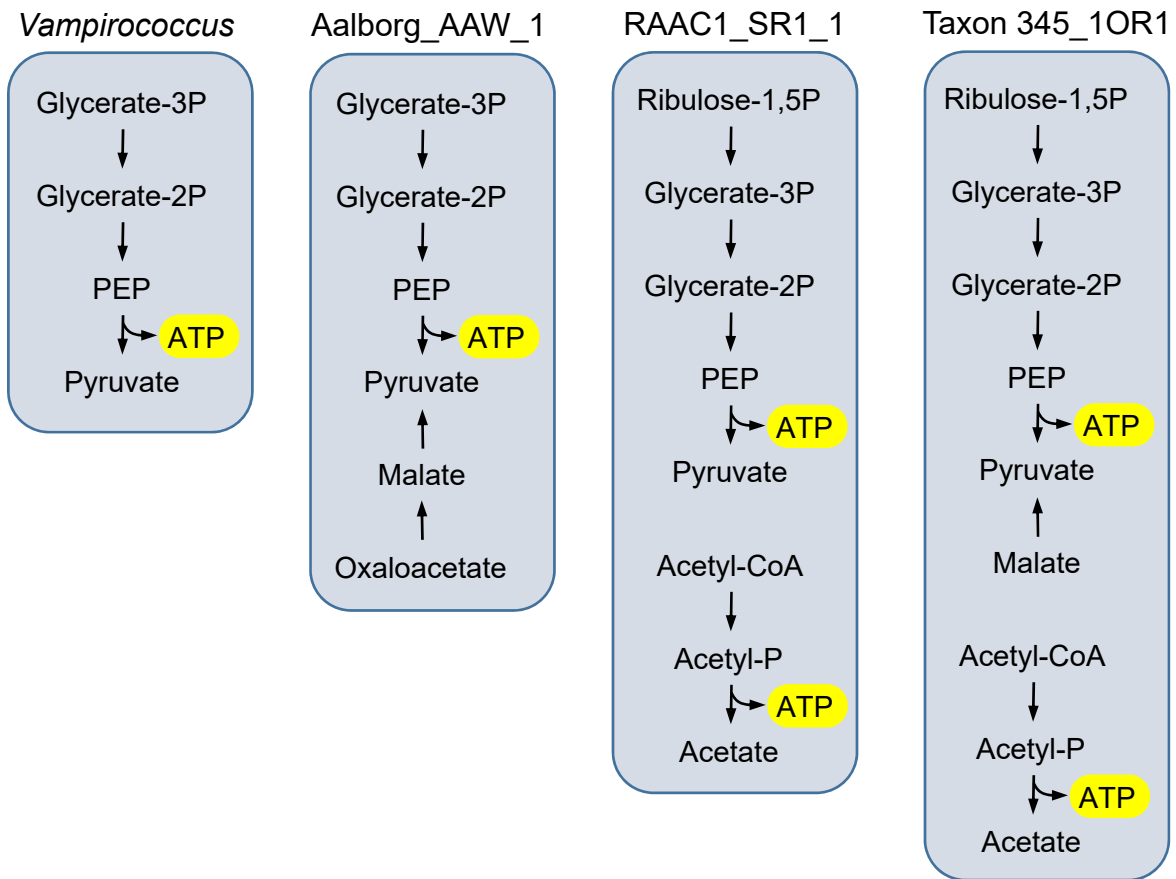

**Extended Data Fig. 6** | ATP production pathways in *Vampirococcus* and three representative Absconditabacteria.

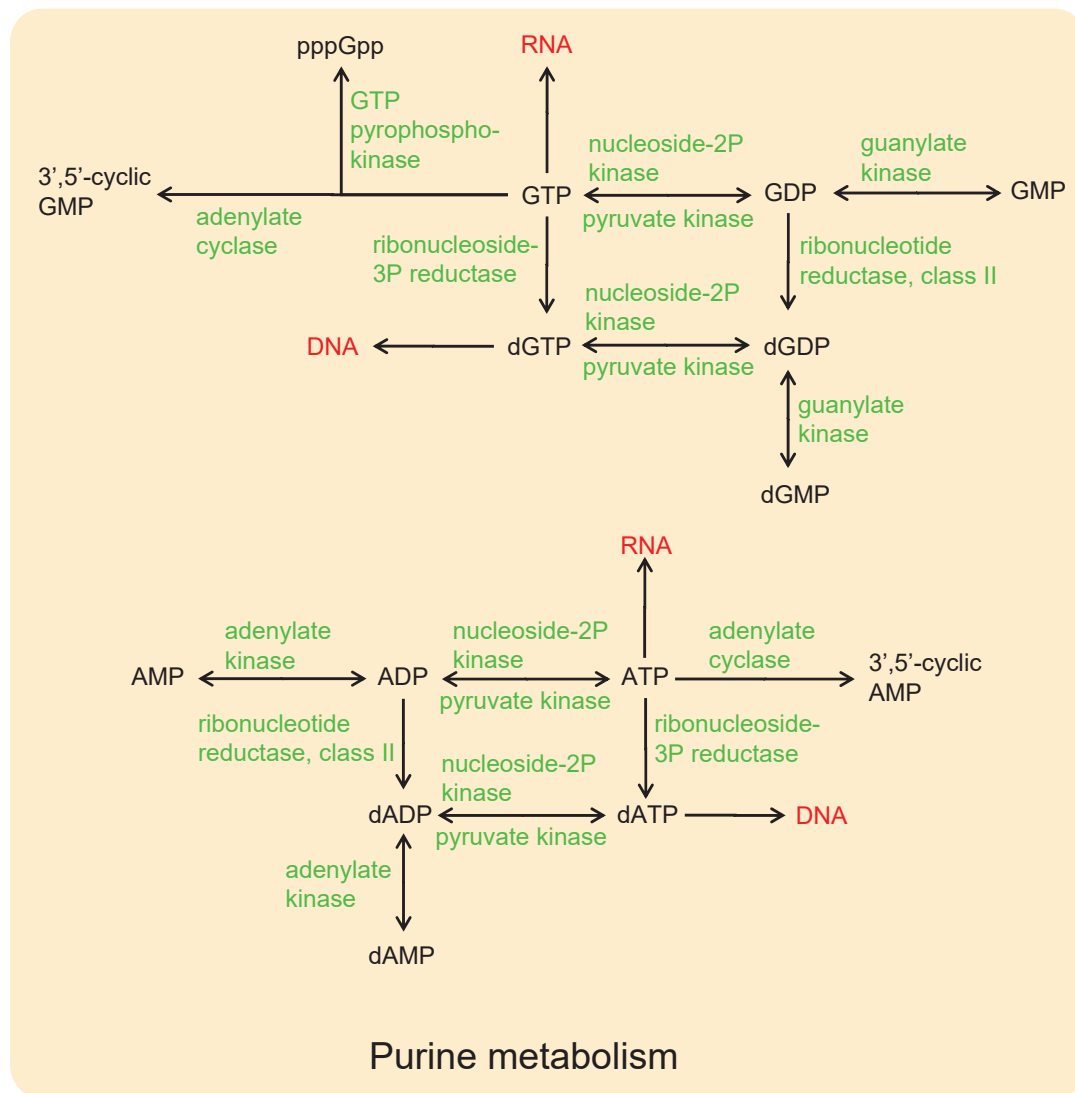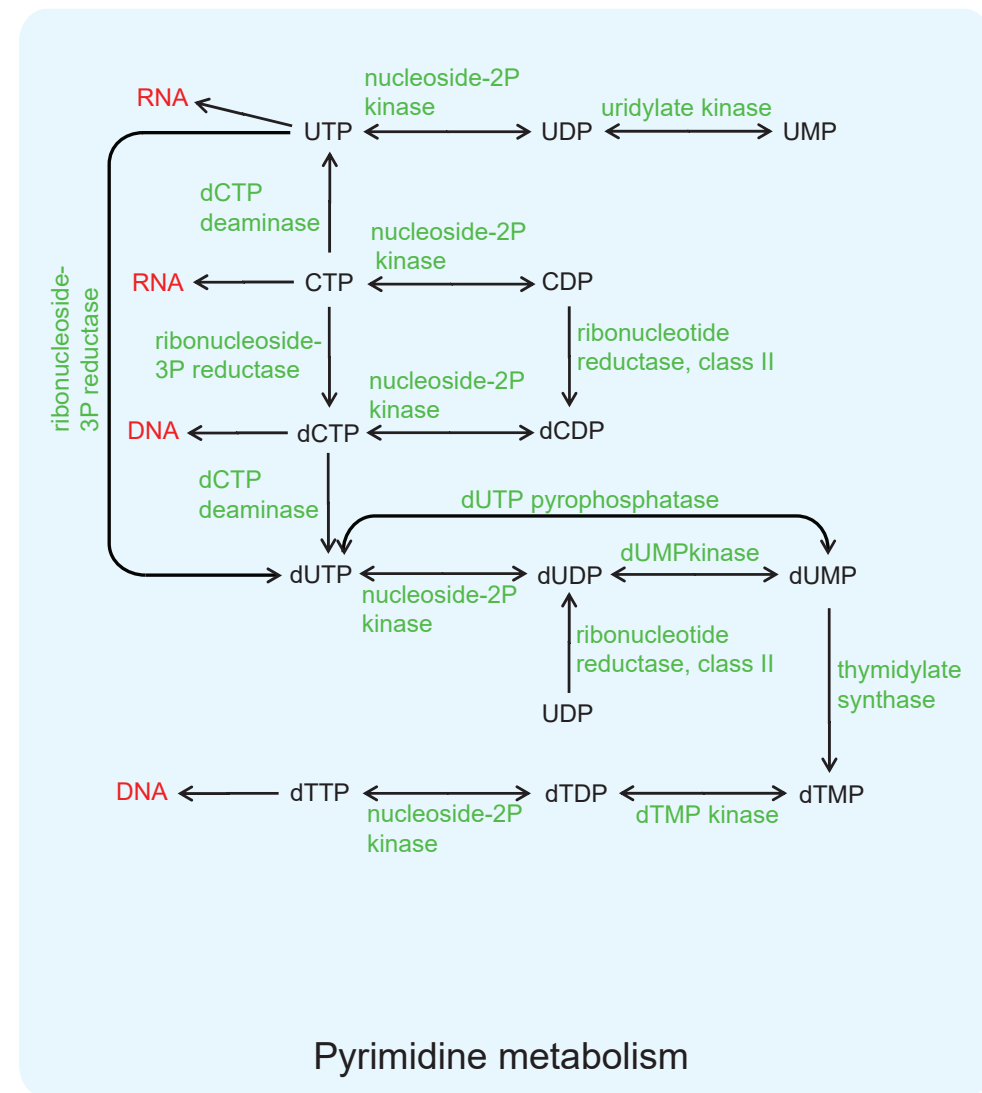

**Extended Data Fig. 7 |** Main pathways involved in purine and pyrimidine metabolism in *Vampirococcus*. Substrates are indicated in black, enzymes in green, and DNA and RNA in red.

| Protein           | Function                                | Size |
|-------------------|-----------------------------------------|------|
| VAMP_16_20        | hypothetical protein                    | 4163 |
| VAMP_134_102      | NAD(P)-dependent dehydrogenase          | 2400 |
| VAMP_6_203        | alpha-2 macroglobulin                   | 2368 |
| VAMP_166_2        | hypothetical protein                    | 2284 |
| VAMP_19_245       | alpha-2 macroglobulin                   | 1895 |
| VAMP_328_89       | membrane protein                        | 1883 |
| VAMP_95_65        | YfaS, alpha-2 macroglobulin family      | 1871 |
| VAMP_54_69        | hypothetical protein                    | 1723 |
| VAMP_17-88-45_126 | PKD repeat-containing protein           | 1396 |
| VAMP_98_96        | DNA-binding beta propeller protein YncE | 1392 |

**Extended Data Fig. 8** | Ten largest proteins encoded in the *Vampirococcus* genome.

## Class II type V

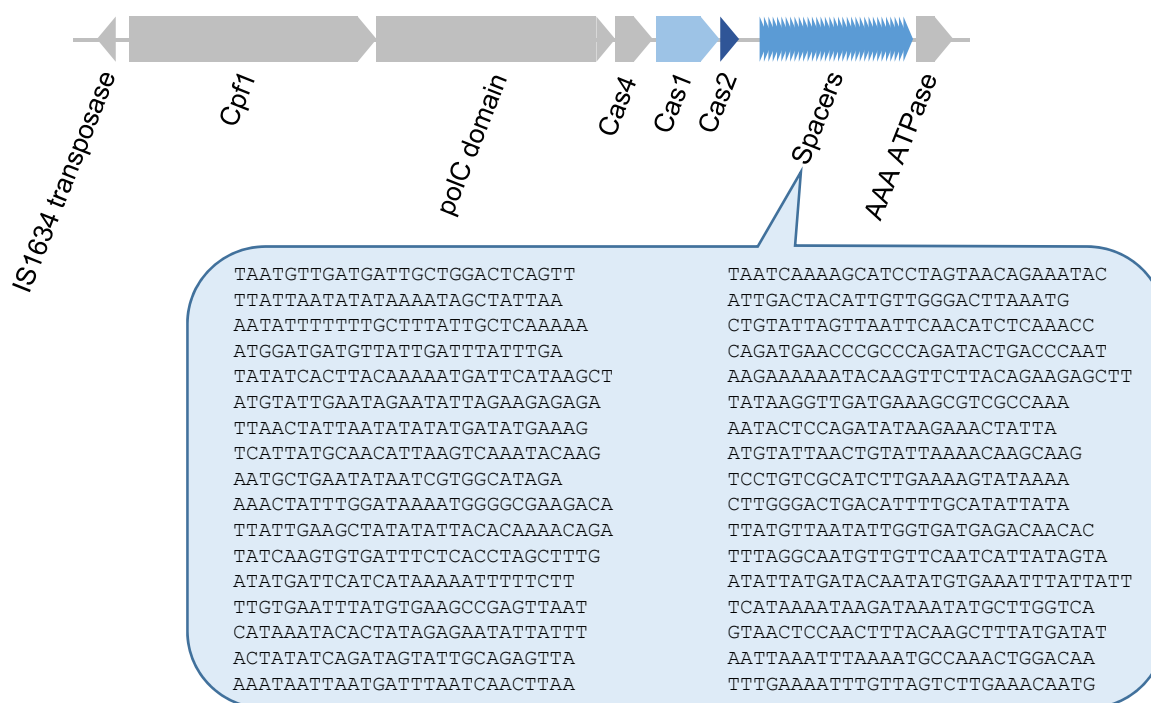

## Class I type III

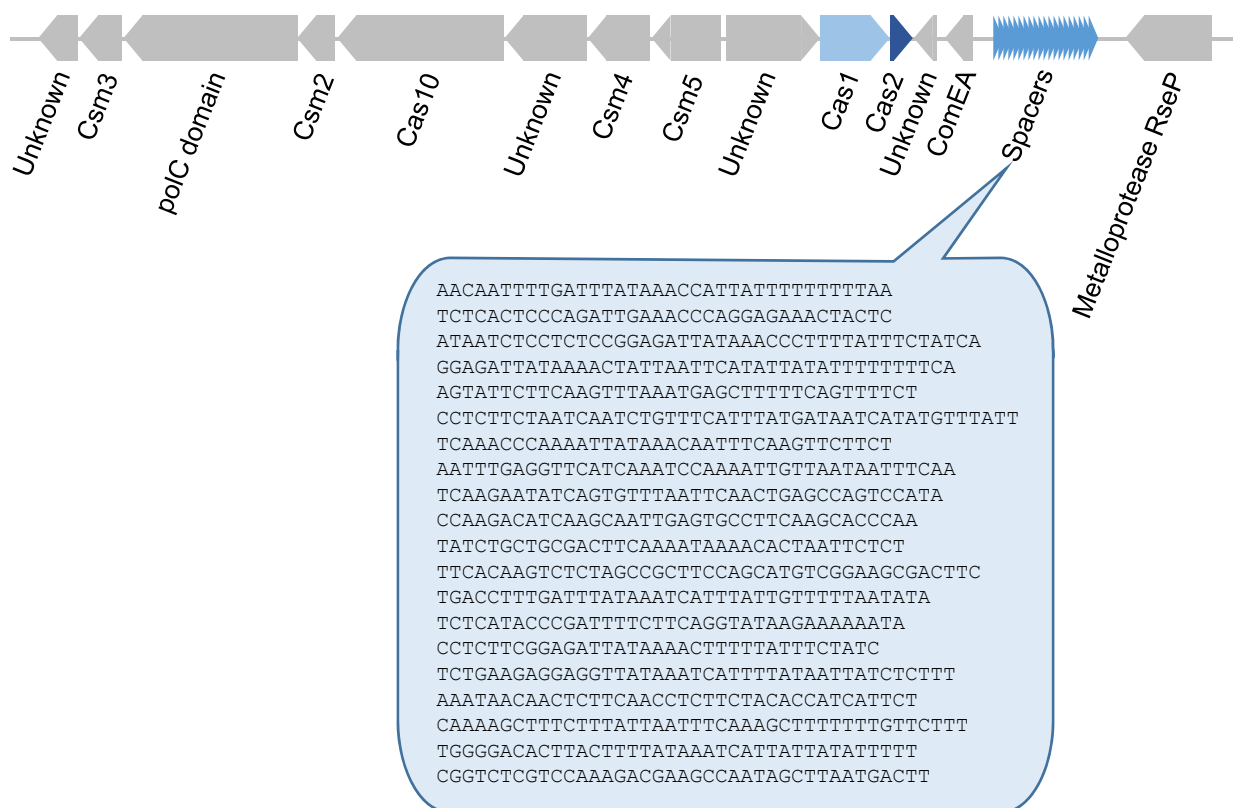

**Extended Data Fig. 9** | The two CRISPR-Cas loci of *Vampirococcus* and their corresponding spacer sequences.

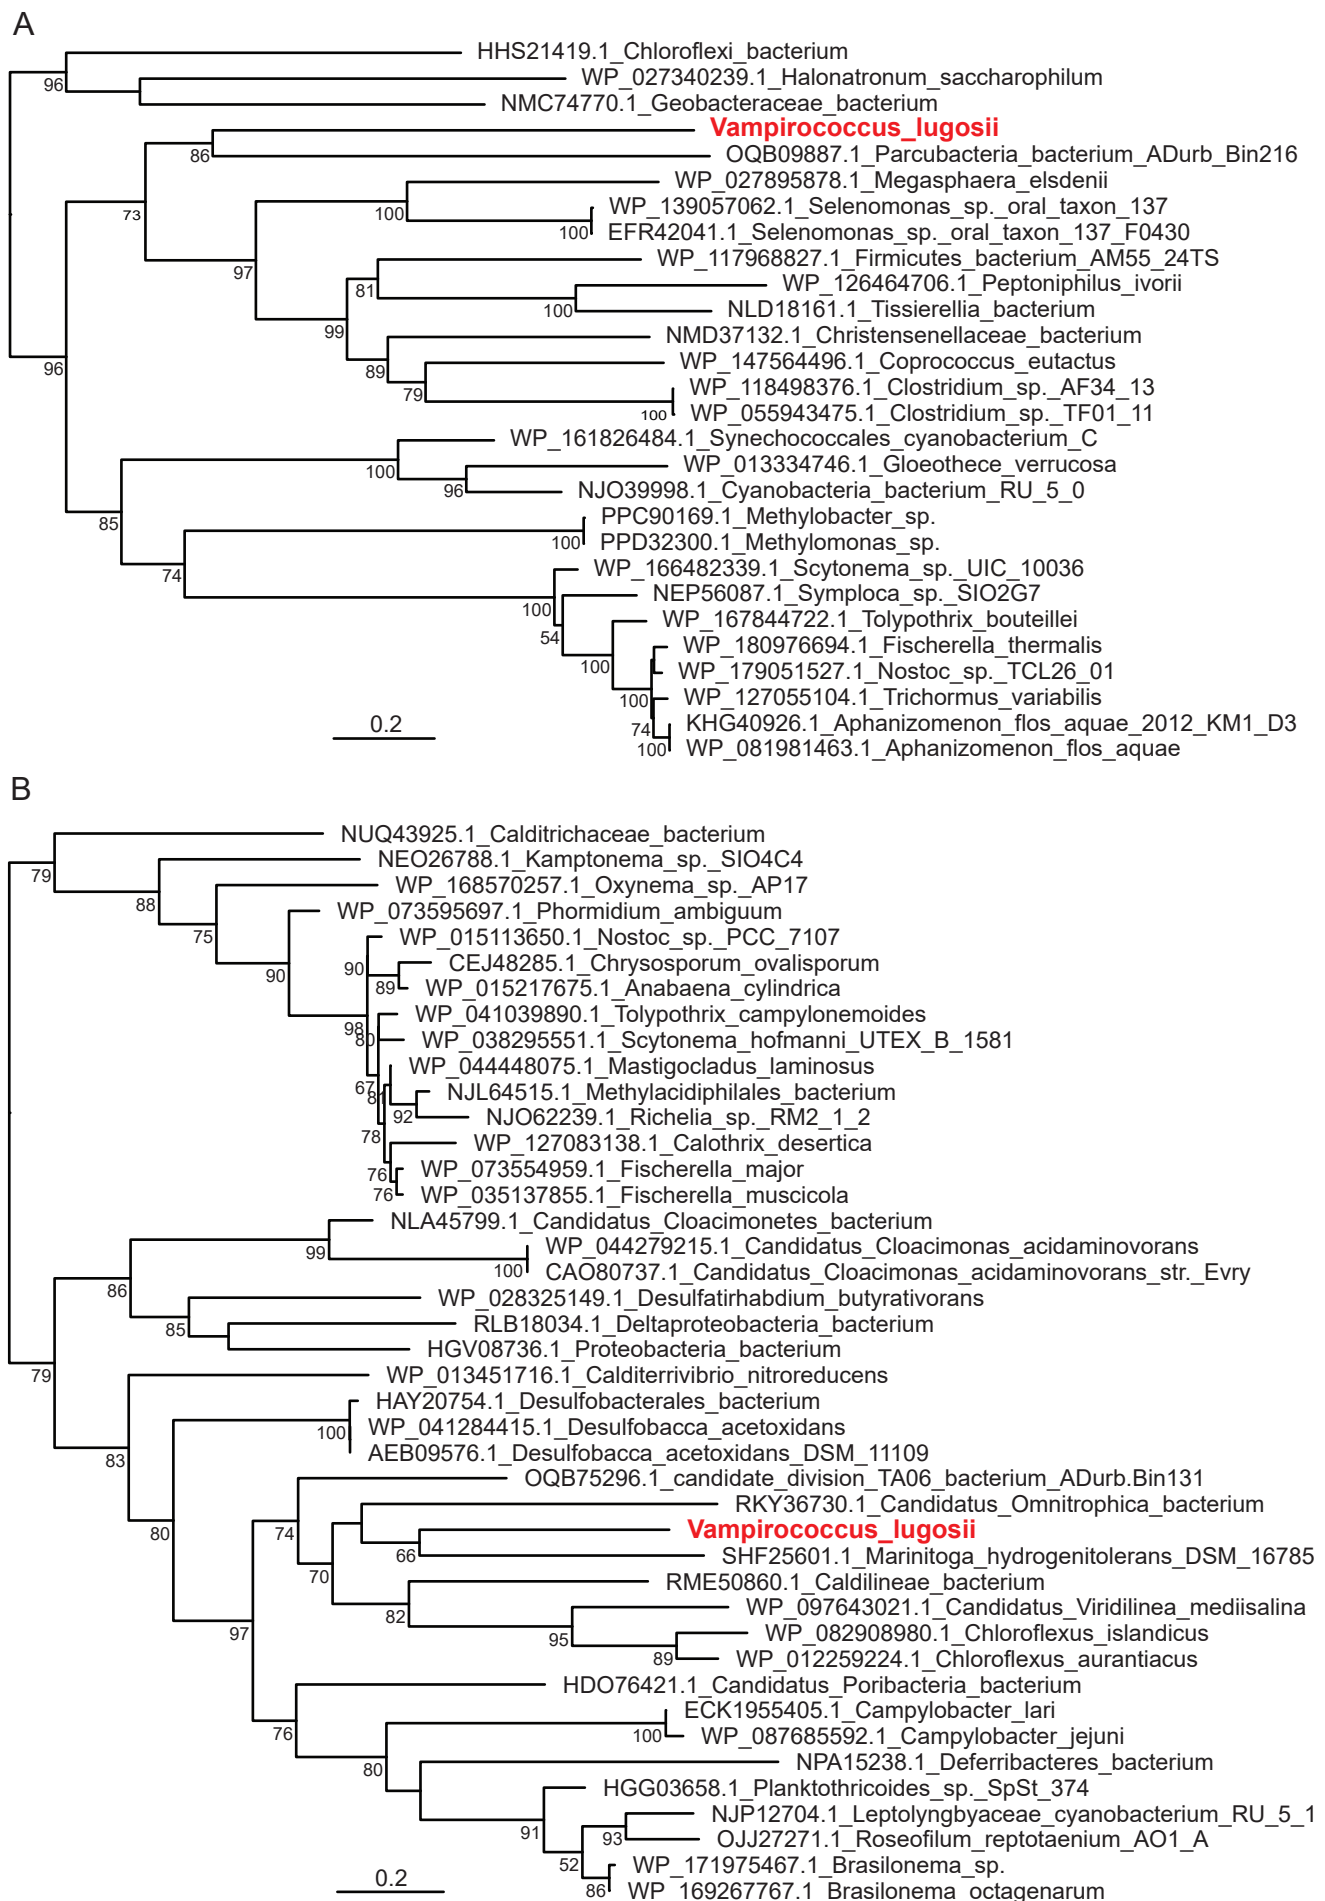

**Extended Data Fig. 10** | Maximum likelihood phylogenetic trees of *Vampirococcus* type I class III CRISPR-Cas enzymes Cas1 (A) and Cas2 (B). The trees are based on 349 and 118 conserved aligned positions, respectively. Numbers at nodes are bootstrap support values (100 replicates, only values >50% are shown).

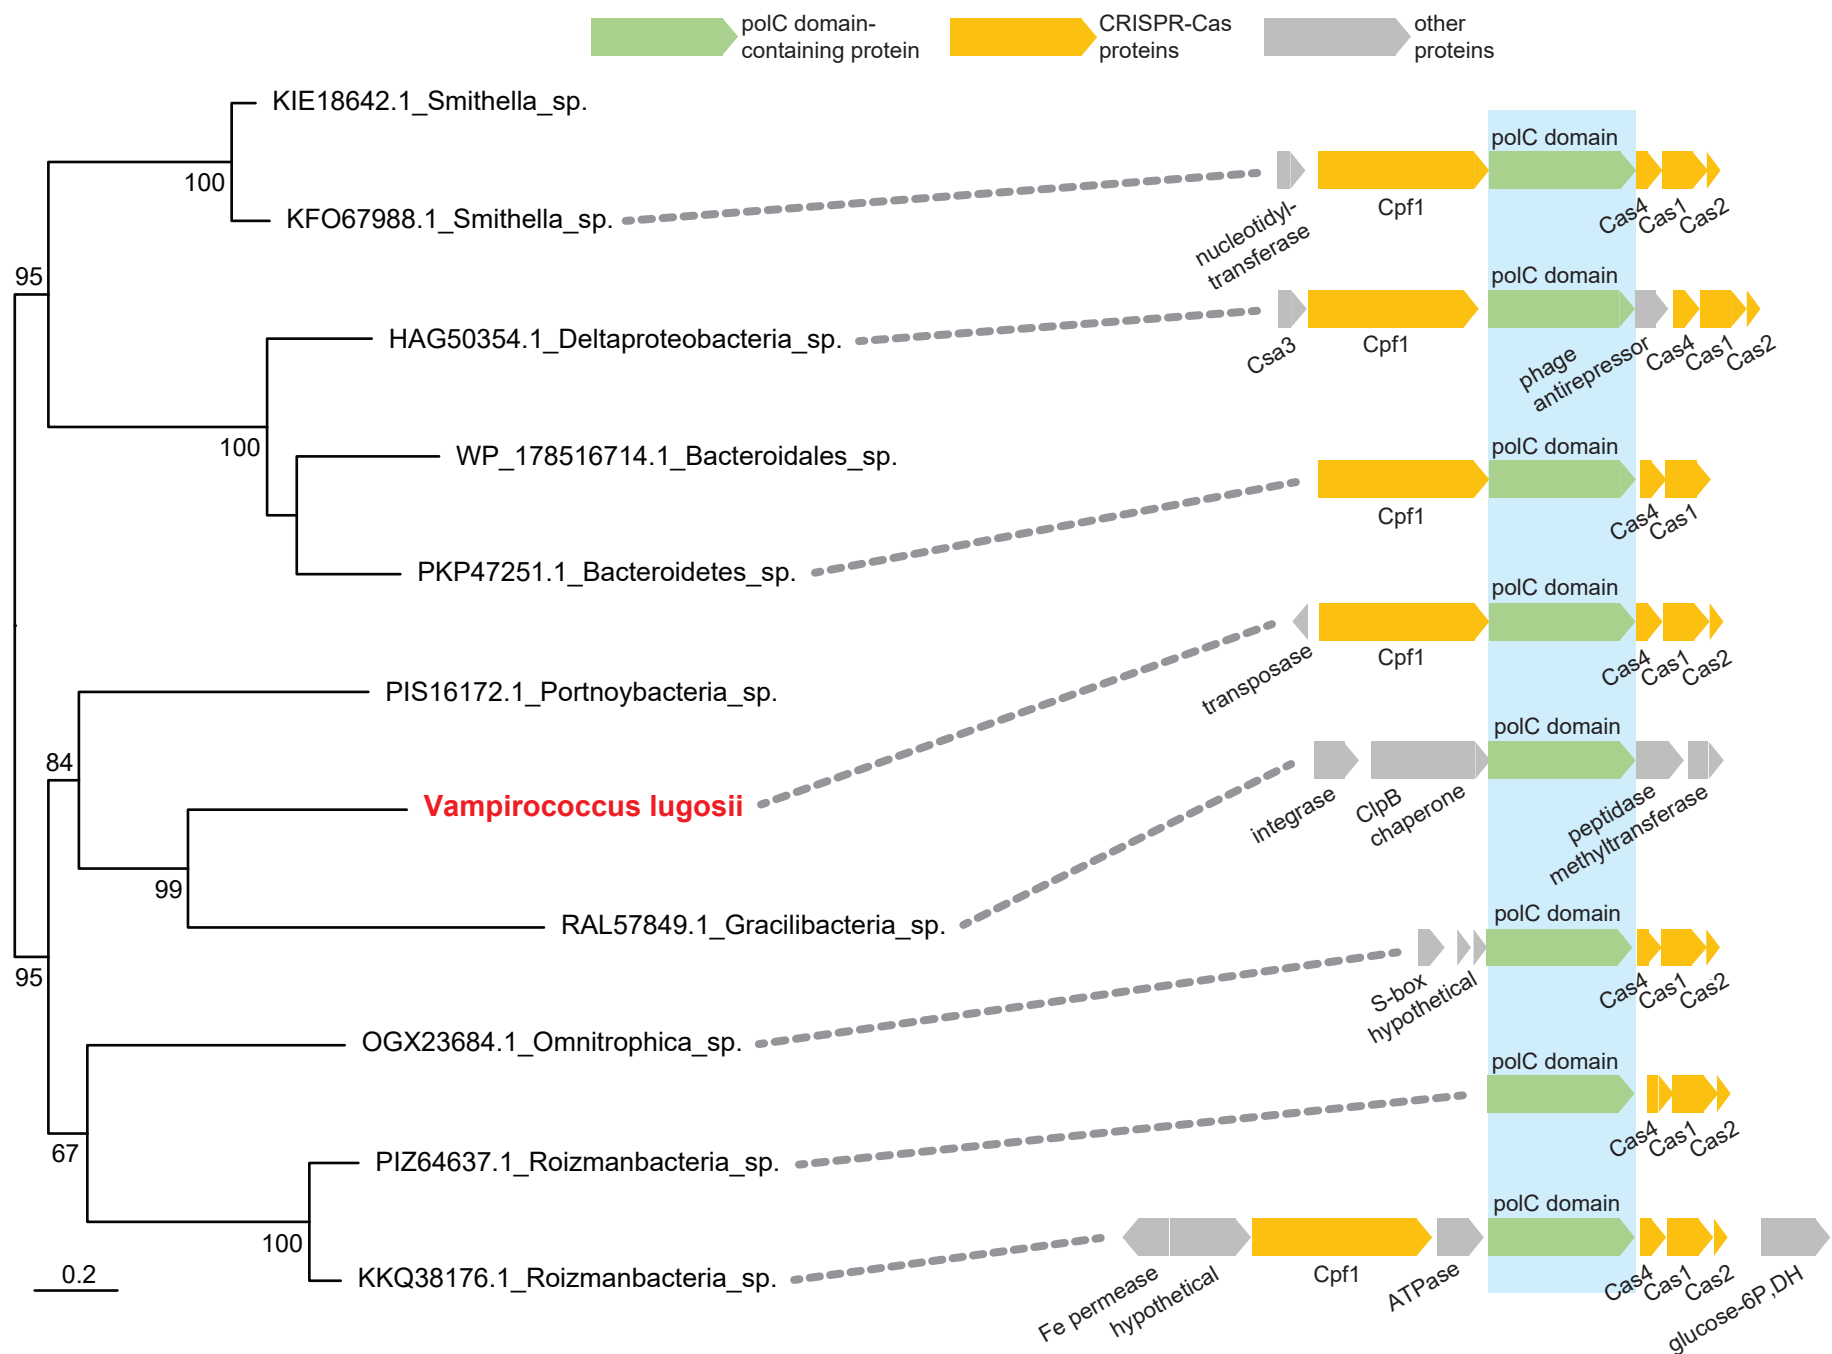

**Extended Data Fig. 11** | Maximum likelihood phylogeny and genomic context of the *Vampirococcus* polC domain-containing protein associated to the class II type V CRISPR-Cas system. The genomic context is shown for the species for which genome sequence data are available. The polC domain-containing protein is shown in green and typical CRISPR-Cas proteins are shown in orange.

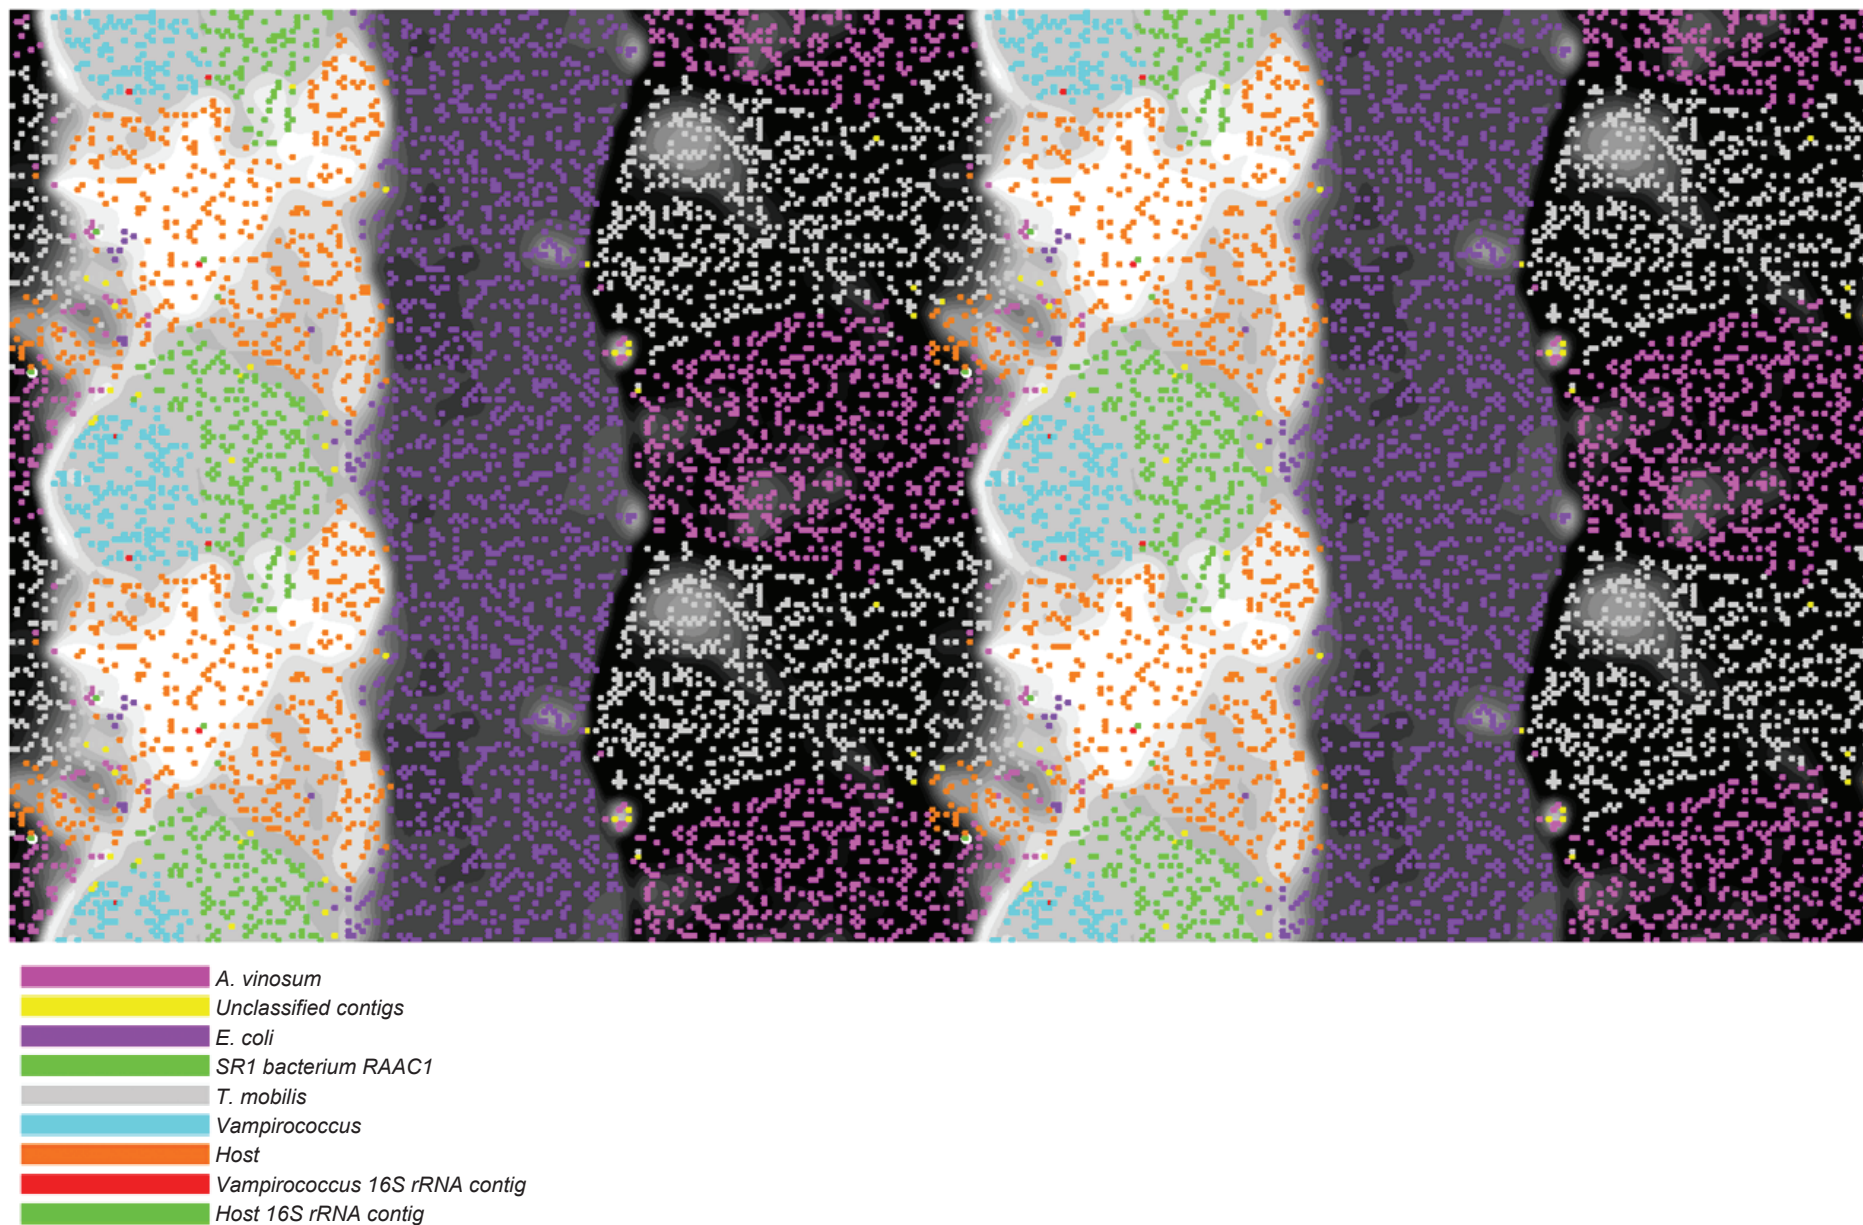

**Extended Data Fig. 12** | Visualization of the ESOM map of the assembled DNA contigs of *Vampirococcus*, its host, and several reference genomes.
